# Supplementary material for: Assessment of the intermediate care unit triage system
Source: PubMed Central journal article supplement — Trauma Surg Acute Care Open. 2018 Sep 8;3(1):e000178. doi: 10.1136/tsaco-2018-000178 (PMC6135419; doi:10.1136/tsaco-2018-000178), 2018-09-08
Supplement: tsaco-2018-000178supp001.pdf [file tsaco-2018-000178supp001.pdf]

**Supplementary File 1.**  
**Flow Chart of the Logistical Classifications of Correct Admissions**

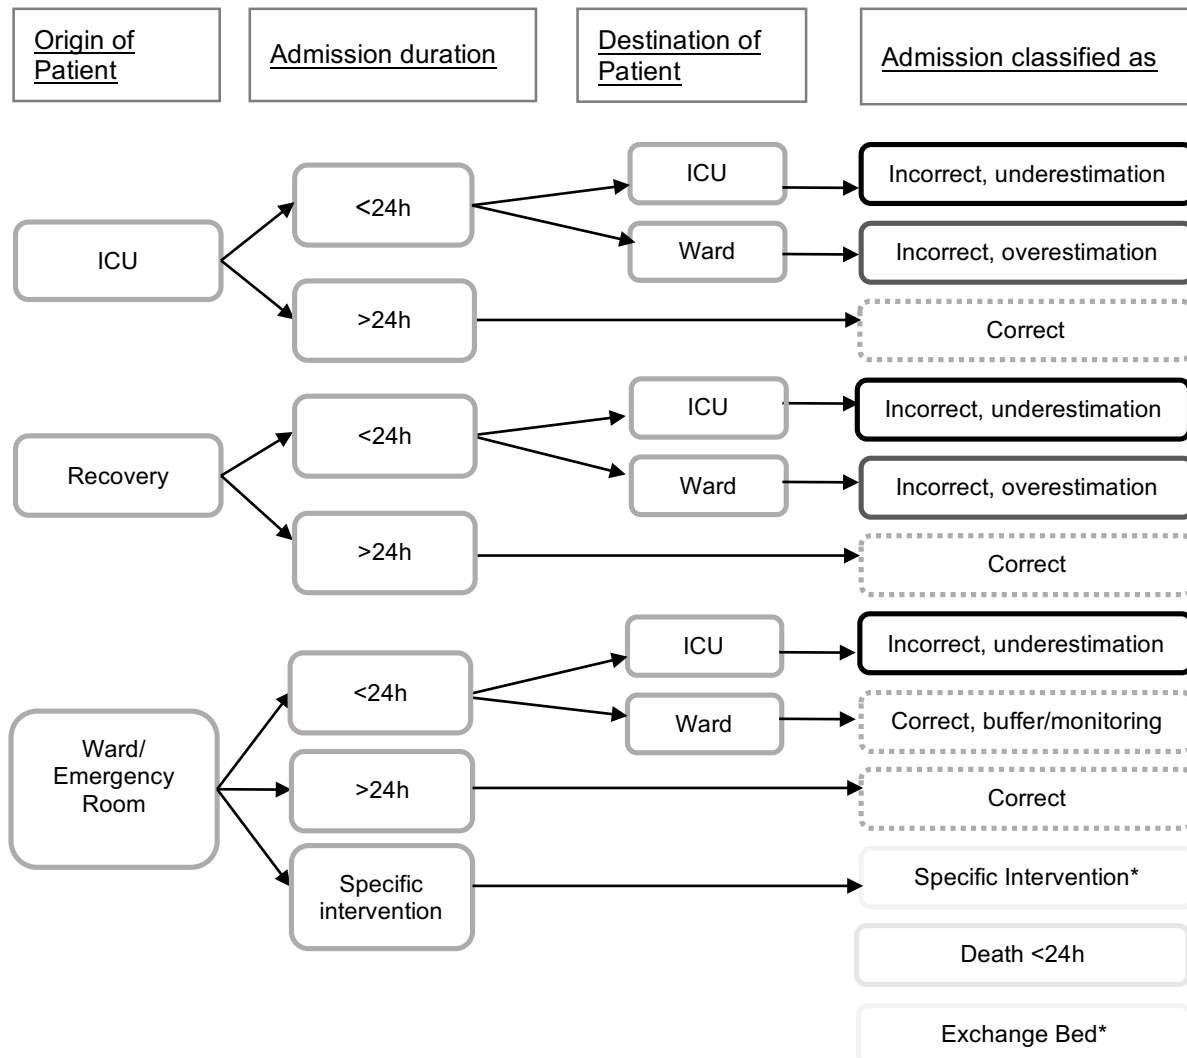

This Flow Chart demonstrates the logistical classification of admissions, as used in this article and elaborated in more detail elsewhere.<sup>11</sup> It uses the origin of the patient, the admission duration and the destination of discharge to determine whether an admission is correct or incorrect. A further distinction is made to determine whether incorrect admissions are due to under-triage of level of care needed (early transfer to the ICU) or due to over-triage of level of care needed.
